# Supplementary material for: Genetic diversity and population structure of Plasmodium vivax in Central China
Source: PubMed Central journal article supplement (PMC4094906; doi:10.1186/1475-2875-13-262), 2014-07-09

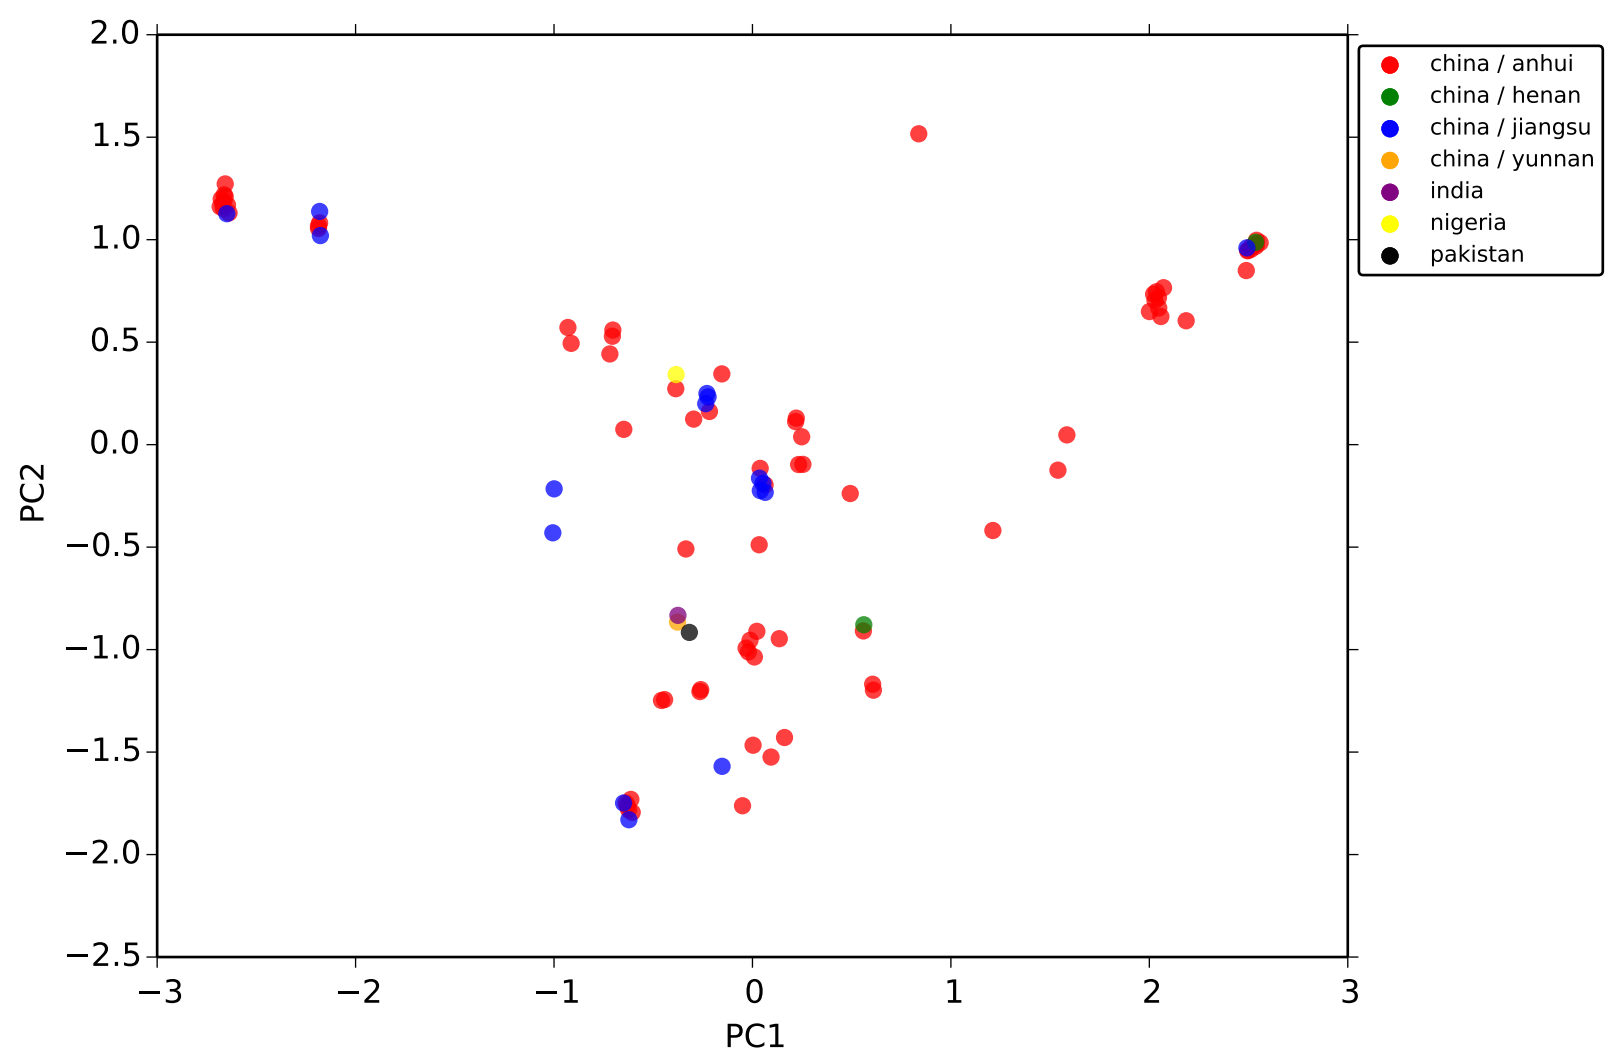

Supplement: 1475-2875-13-262-S4.pdf [file 1475-2875-13-262-S4.pdf]
